# Supplementary material for: Identification of N-Acetyldopamine Dimers from the Dung Beetle Catharsius molossus and Their COX-1 and COX-2 Inhibitory Activities
Source: MDPI journal article supplement (doi:10.3390/molecules200915589), 2015-08-27
Supplement: s1 [file s1]

## Contents of Supporting Information

**Figure S1.**  $^1\text{H}$ -NMR spectrum of **1** in  $\text{CD}_3\text{OD}$ .

**Figure S2.**  $^{13}\text{C}$ -NMR and DEPT spectra of **1** in  $\text{CD}_3\text{OD}$ .

**Figure S3.** HSQC spectrum of **1** in  $\text{CD}_3\text{OD}$ .

**Figure S4.** HMBC spectrum of **1** in  $\text{CD}_3\text{OD}$ .

**Figure S5.**  $^1\text{H}$ - $^1\text{H}$  COSY spectrum of **1** in  $\text{CD}_3\text{OD}$ .

**Figure S6.** HRESIMS spectrum of **1**.

**Figure S7.**  $^1\text{H}$ -NMR spectrum of **2** in  $\text{CD}_3\text{OD}$ .

**Figure S8.**  $^{13}\text{C}$ -NMR and DEPT spectra of **2** in  $\text{CD}_3\text{OD}$ .

**Figure S9.** HSQC spectrum of **2** in  $\text{CD}_3\text{OD}$ .

**Figure S10.** HMBC spectrum of **2** in  $\text{CD}_3\text{OD}$ .

**Figure S11.**  $^1\text{H}$ - $^1\text{H}$  COSY spectrum of **2** in  $\text{CD}_3\text{OD}$ .

**Figure S12.** HRESIMS spectrum of **2**.

**Figure S13.**  $^1\text{H}$ -NMR spectrum of **3** in  $\text{CD}_3\text{OD}$ .

**Figure S14.**  $^{13}\text{C}$ -NMR and DEPT spectra of **3** in  $\text{CD}_3\text{OD}$ .

**Figure S15.** HSQC spectrum of **3** in  $\text{CD}_3\text{OD}$ .

**Figure S16.** HMBC spectrum of **3** in  $\text{CD}_3\text{OD}$ .

**Figure S17.**  $^1\text{H}$ - $^1\text{H}$  COSY spectrum of **3** in  $\text{CD}_3\text{OD}$ .

**Figure S18.** HRESIMS spectrum of **3**.

**Figure S19.**  $^1\text{H}$ -NMR spectrum of **4** in  $\text{CD}_3\text{OD}$ .

**Figure S20.**  $^{13}\text{C}$ -NMR and DEPT spectra of **4** in  $\text{CD}_3\text{OD}$ .

**Figure S21.** HSQC spectrum of **4** in  $\text{CD}_3\text{OD}$ .

**Figure S22.** HMBC spectrum of **4** in  $\text{CD}_3\text{OD}$ .

**Table S1.** The  $^1\text{H}$ - and  $^{13}\text{C}$ -NMR spectroscopic data of **4**.

**Table S2.** COX-1 and COX-2 inhibitory activities of the compounds.

**Table S3.** Cytotoxicity of the compounds.

**Table S4.** MDCK cell-based anti-influenza activities of the compounds.

**Table S5.** EV71 inhibitory activities of the compounds.

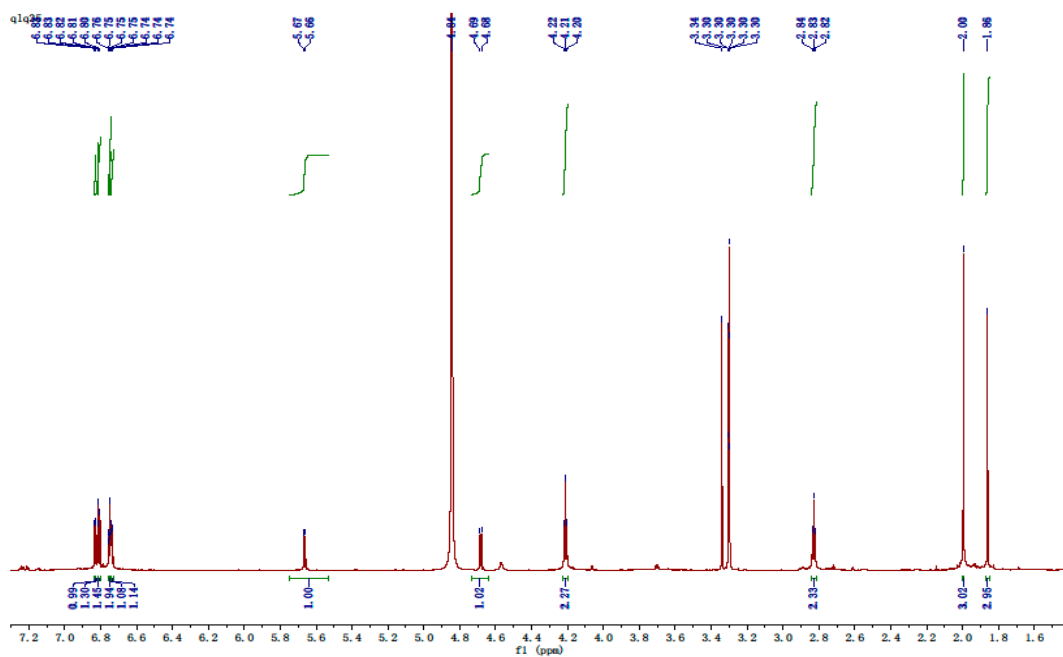

Figure S1.  $^1\text{H}$ -NMR spectrum of **1** in  $\text{CD}_3\text{OD}$ .

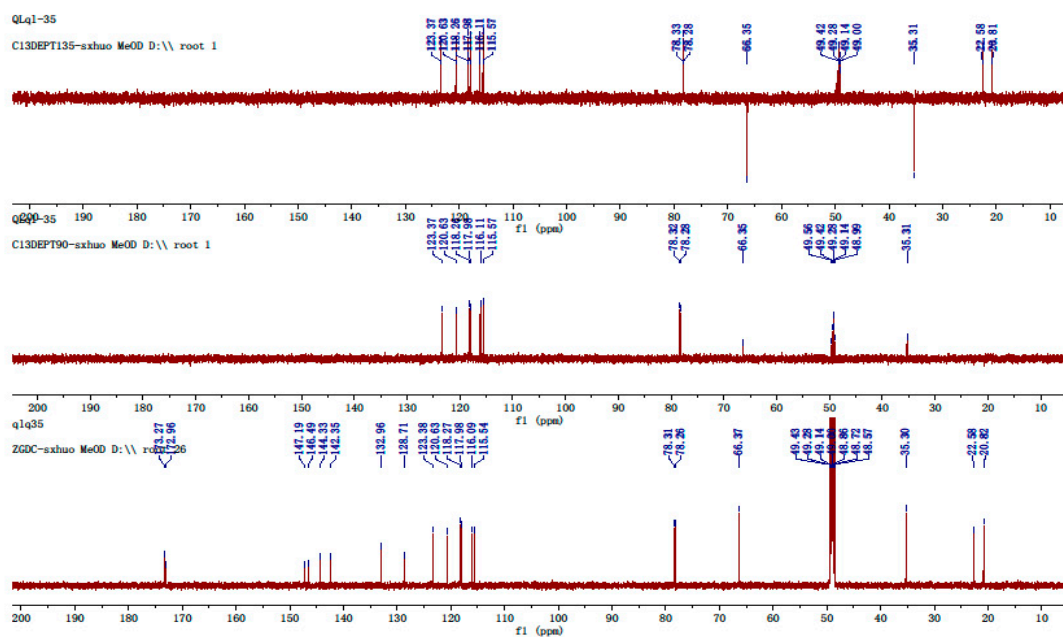

Figure S2.  $^{13}\text{C}$ -NMR and DEPT spectra of **1** in  $\text{CD}_3\text{OD}$ .

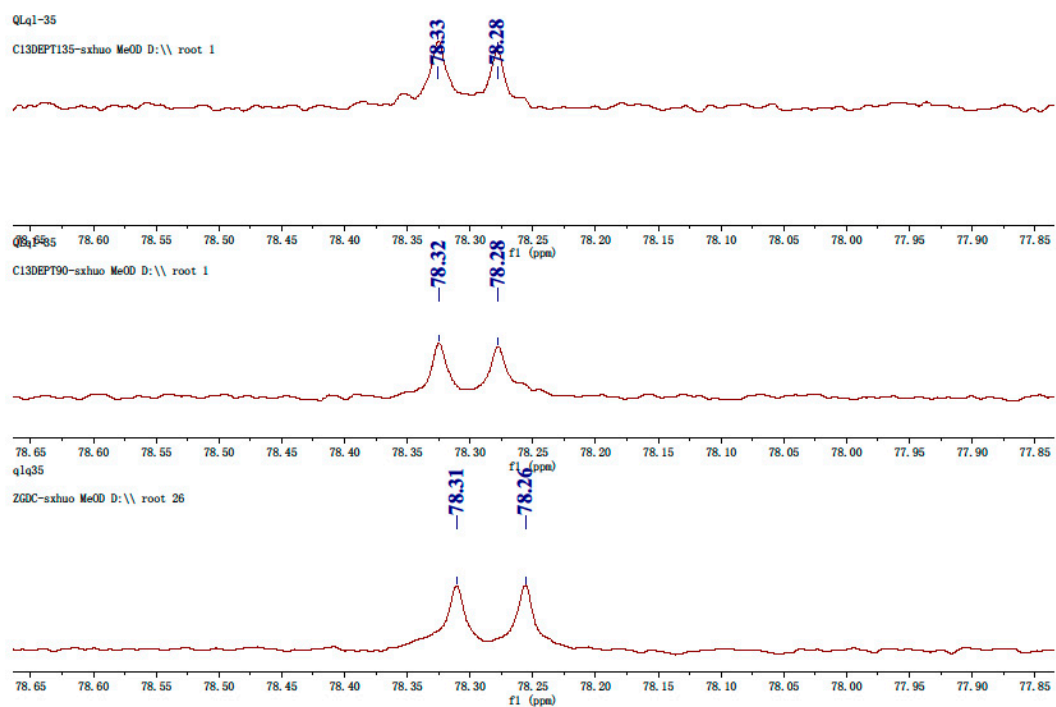

Enlarged  $^{13}\text{C}$ -NMR and DEPT spectra of **1** (C-2,C-3) in  $\text{CD}_3\text{OD}$ .

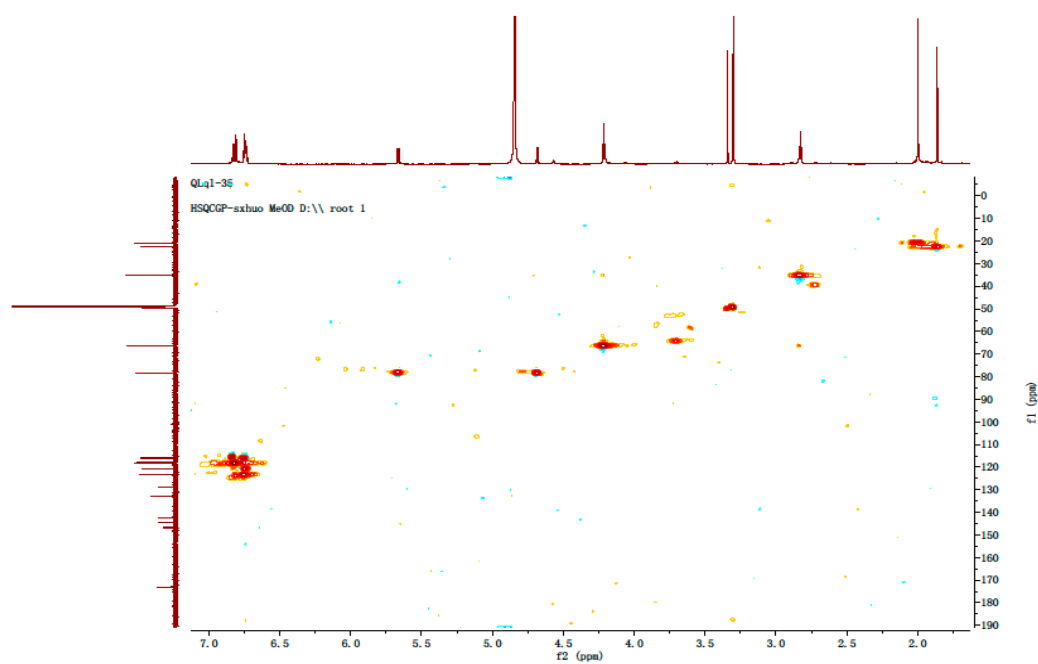

Figure S3. HSQC spectrum of **1** in  $\text{CD}_3\text{OD}$ .

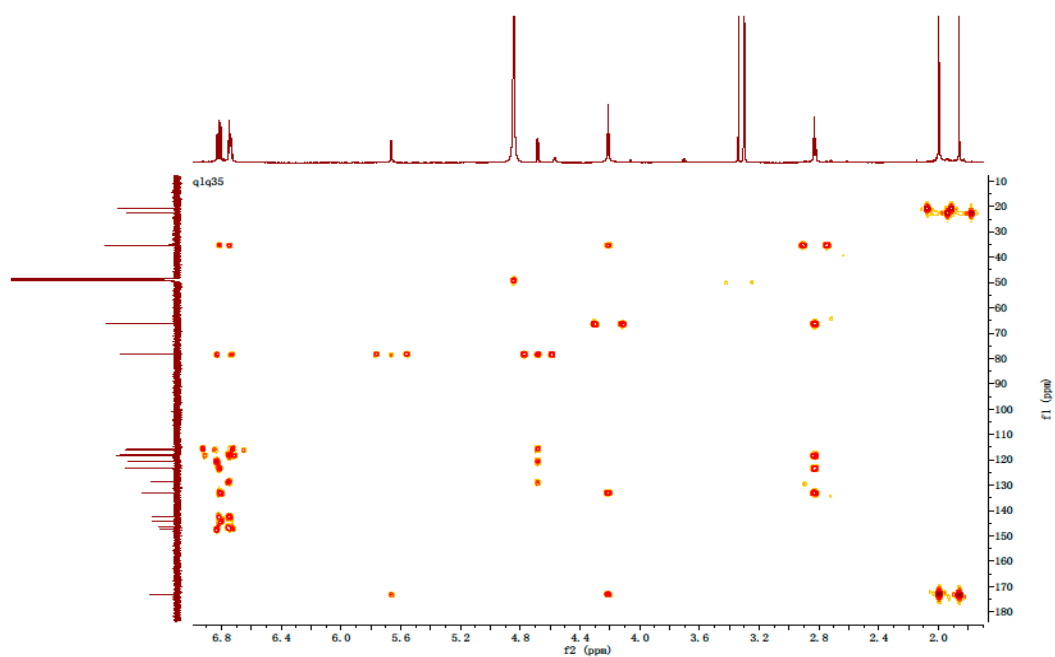

Figure S4. HMBC spectrum of **1** in CD<sub>3</sub>OD.

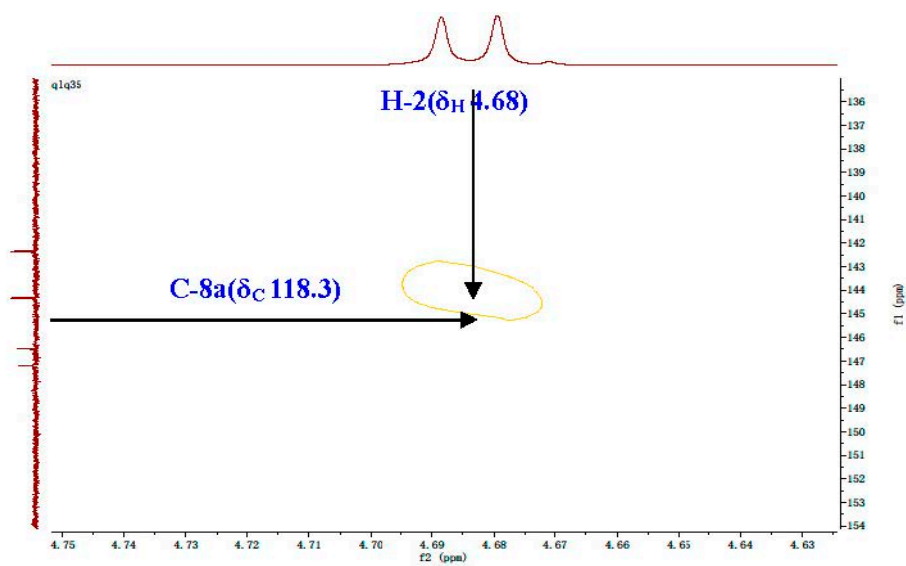

Enlarged HMBC spectrum of **1** (key correlations of H-2/C-8a) in CD<sub>3</sub>OD.

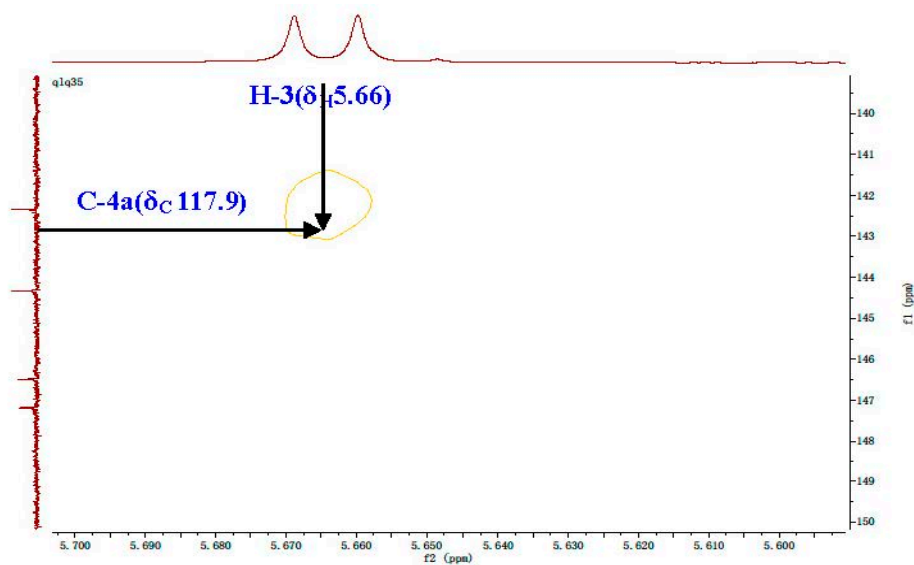

Enlarged HMBC spectrum of **1** (key correlations of H-3/C-4a) in CD<sub>3</sub>OD.

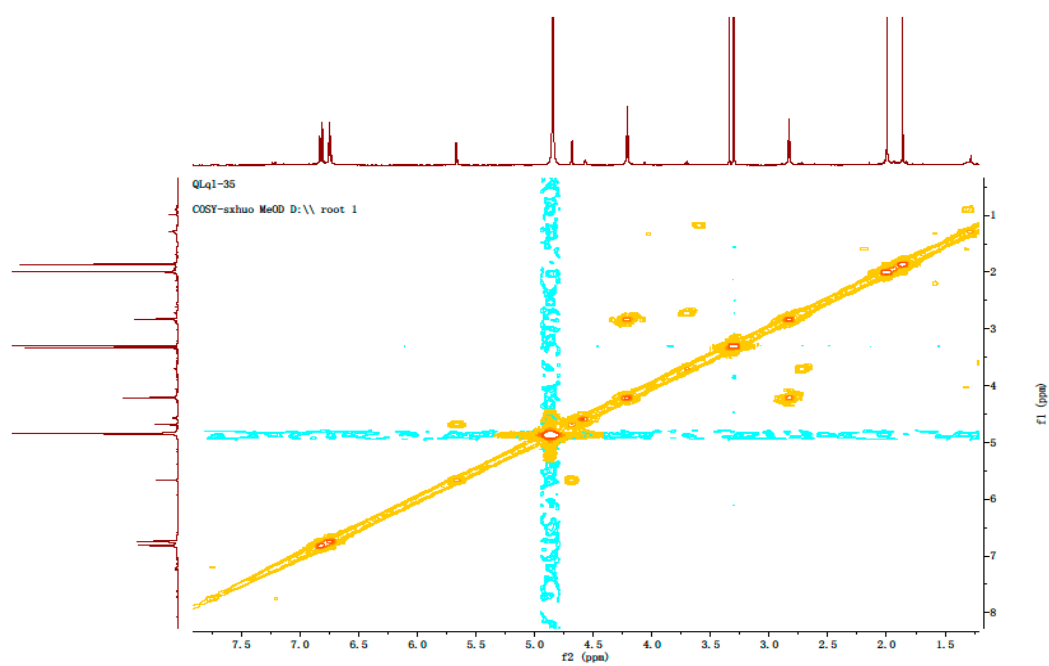

Figure S5. <sup>1</sup>H-<sup>1</sup>H COSY spectrum of **1** in CD<sub>3</sub>OD.

## Qualitative Analysis Report

|                               |              |                      |                      |
|-------------------------------|--------------|----------------------|----------------------|
| <b>Data Filename</b>          | qlql-35.d    | <b>Sample Name</b>   | qlql-35              |
| <b>Sample Type</b>            | Sample       | <b>Position</b>      | P1-A1                |
| <b>Instrument Name</b>        | Instrument 1 | <b>User Name</b>     |                      |
| <b>Acq Method</b>             | SIBU.m       | <b>Acquired Time</b> | 4/13/2015 2:06:28 PM |
| <b>IRM Calibration Status</b> | Success      | <b>DA Method</b>     | Default.m            |
| <b>Comment</b>                |              |                      |                      |

|                       |                             |              |
|-----------------------|-----------------------------|--------------|
| <b>Sample Group</b>   |                             | <b>Info.</b> |
| <b>Acquisition SW</b> | 6200 series TOF/6500 series |              |
| <b>Version</b>        | Q-TOF B.05.01 (B5125.2)     |              |

### User Spectra

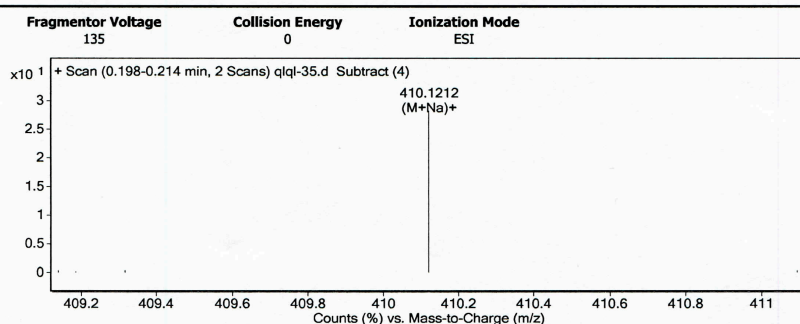

### Peak List

| m/z      | z | Abund    | Formula                                          | Ion                 |
|----------|---|----------|--------------------------------------------------|---------------------|
| 274.2745 | 1 | 24310.29 |                                                  |                     |
| 302.3055 | 1 | 10523.09 |                                                  |                     |
| 318.3002 | 1 | 12763.09 |                                                  |                     |
| 381.2981 | 1 | 9396.49  |                                                  |                     |
| 388.1392 | 1 | 8674.9   |                                                  |                     |
| 410.1212 | 1 | 15832.46 | C <sub>20</sub> H <sub>21</sub> N O <sub>7</sub> | (M+Na) <sup>+</sup> |

### Formula Calculator Element Limits

| Element | Min | Max |
|---------|-----|-----|
| C       | 3   | 60  |
| H       | 0   | 120 |
| N       | 0   | 10  |
| O       | 0   | 30  |

### Formula Calculator Results

| Formula                                          | CalculatedMass | CalculatedMz | Mz       | Diff. (mDa) | Diff. (ppm) | DBE     |
|--------------------------------------------------|----------------|--------------|----------|-------------|-------------|---------|
| C <sub>20</sub> H <sub>21</sub> N O <sub>7</sub> | 387.1318       | 410.1210     | 410.1212 | -0.3        | -0.9        | 11.0000 |

--- End Of Report ---

Figure S6. HRESIMS spectrum of 1.

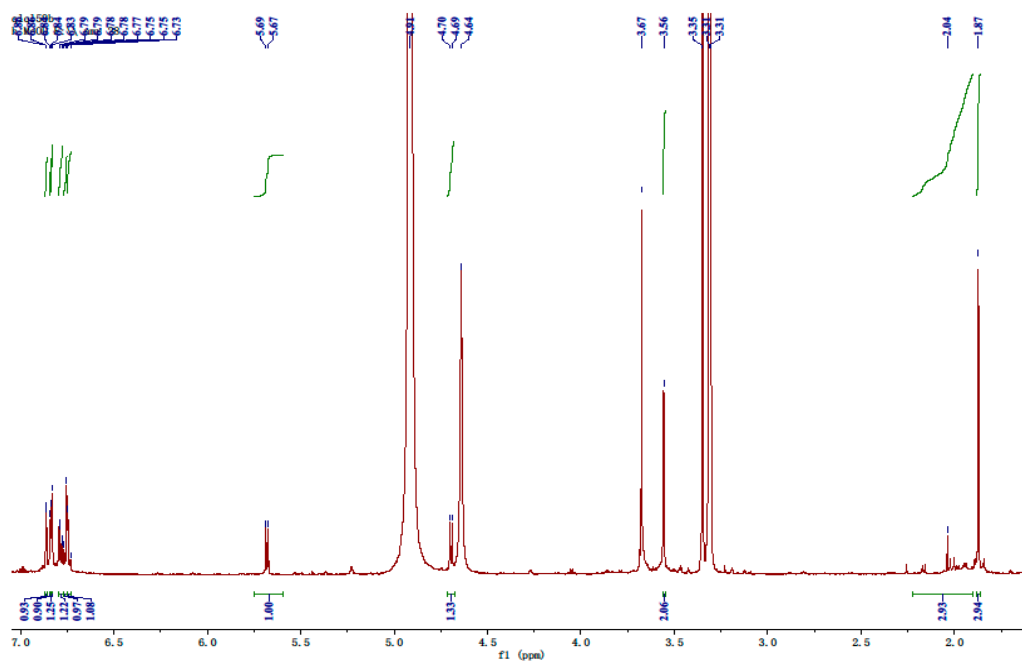

Figure S7.  $^1\text{H-NMR}$  spectrum of **2** in  $\text{CD}_3\text{OD}$ .

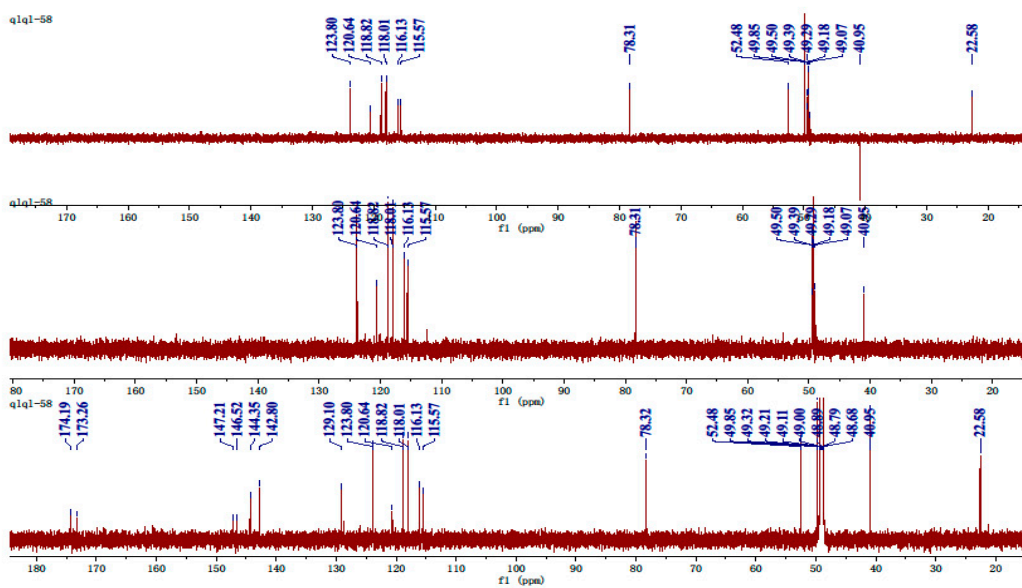

Figure S8.  $^{13}\text{C-NMR}$  and DEPT spectra of **2** in  $\text{CD}_3\text{OD}$ .

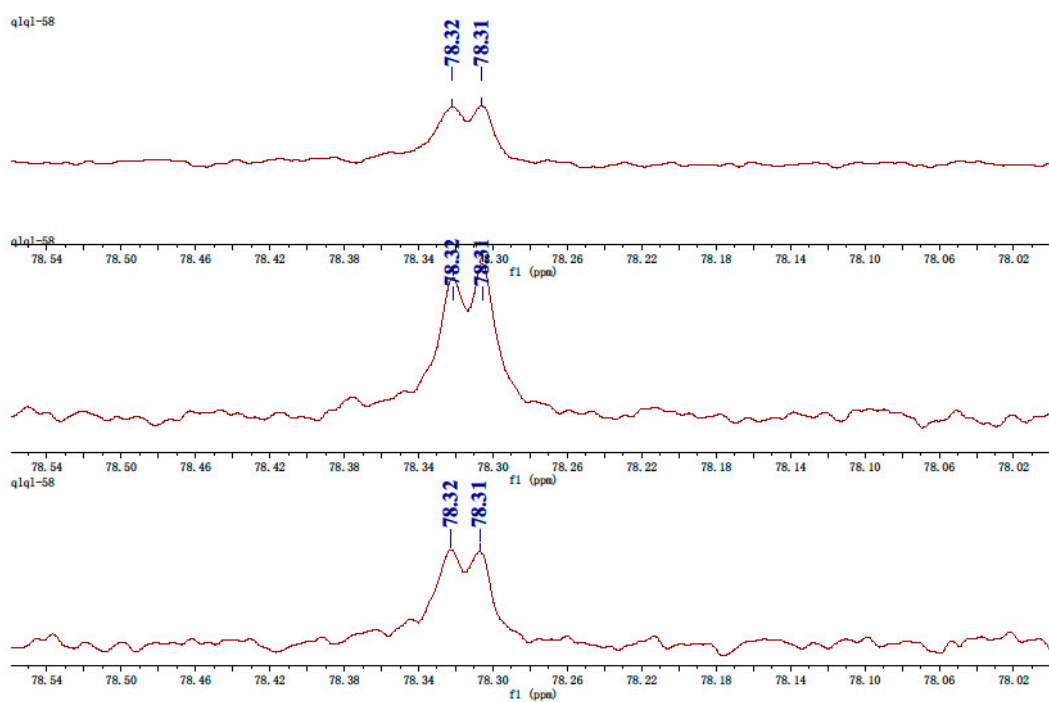

Enlarged  $^{13}\text{C}$ -NMR and DEPT spectra of **2** (C-2, C-3) in  $\text{CD}_3\text{OD}$ .

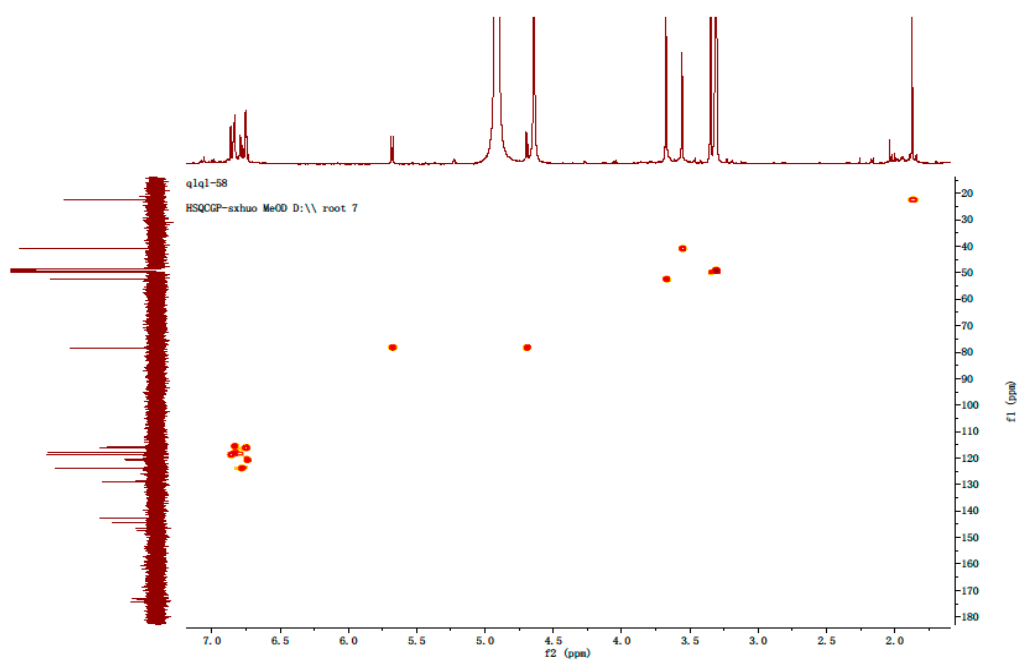

Figure S9. HSQC spectrum of **2** in  $\text{CD}_3\text{OD}$ .



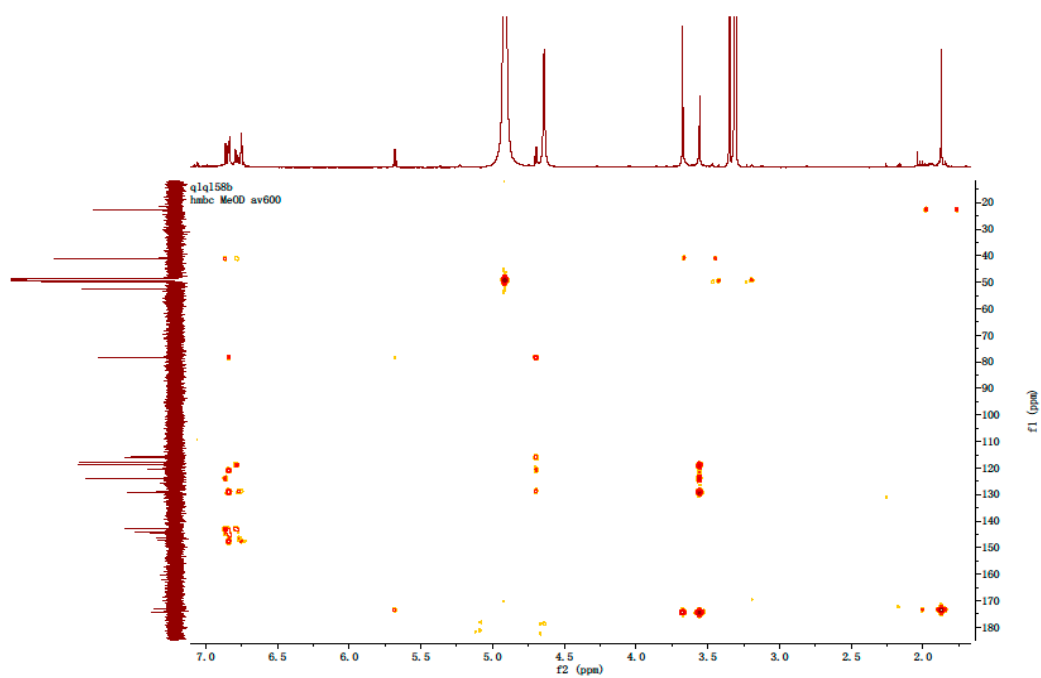

Figure S10. HMBC spectrum of **2** in CD<sub>3</sub>OD.

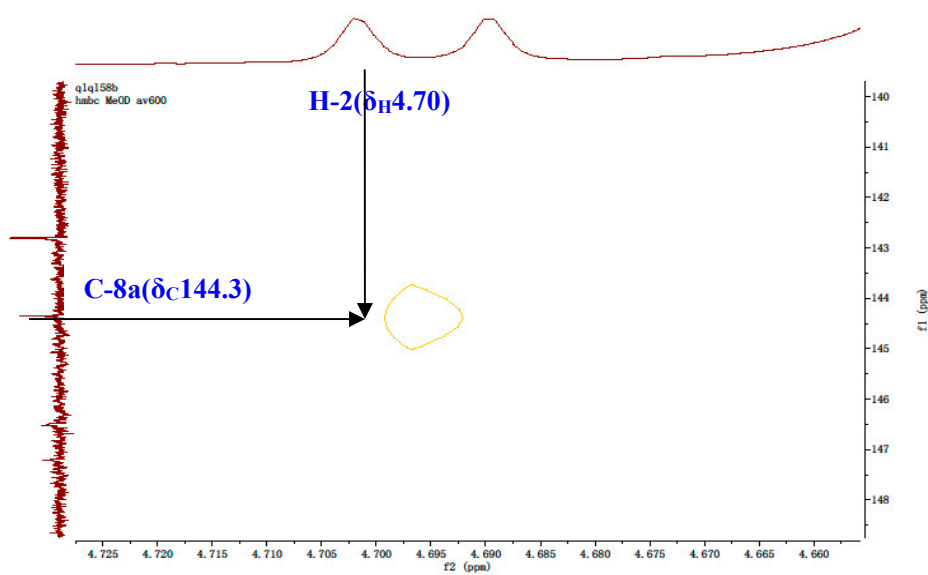

Enlarged HMBC spectrum of **2** (key correlations of H-2/C-8a) in CD<sub>3</sub>OD.

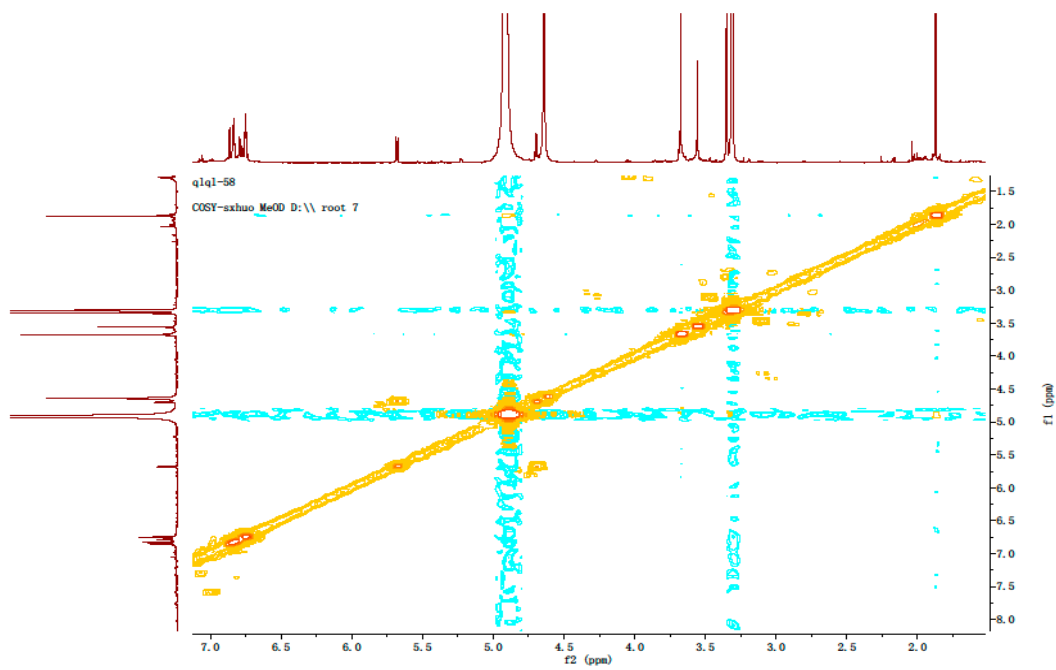

**Figure S11.**  $^1\text{H}$ - $^1\text{H}$  COSY spectrum of **2** in  $\text{CD}_3\text{OD}$ .

### Qualitative Analysis Report

|                               |                                                        |                      |                      |
|-------------------------------|--------------------------------------------------------|----------------------|----------------------|
| <b>Data Filename</b>          | qlql-58.d                                              | <b>Sample Name</b>   | qlql-58              |
| <b>Sample Type</b>            | Sample                                                 | <b>Position</b>      | P1-A3                |
| <b>Instrument Name</b>        | Instrument 1                                           | <b>User Name</b>     |                      |
| <b>Acq Method</b>             | SIBU.m                                                 | <b>Acquired Time</b> | 4/13/2015 2:10:14 PM |
| <b>IRM Calibration Status</b> | Success                                                | <b>DA Method</b>     | Default.m            |
| <b>Comment</b>                |                                                        |                      |                      |
| <b>Sample Group</b>           |                                                        | <b>Info.</b>         |                      |
| <b>Acquisition SW Version</b> | 6200 series TOF/6500 series<br>Q-TOF B.05.01 (B5125.2) |                      |                      |

**User Spectra**

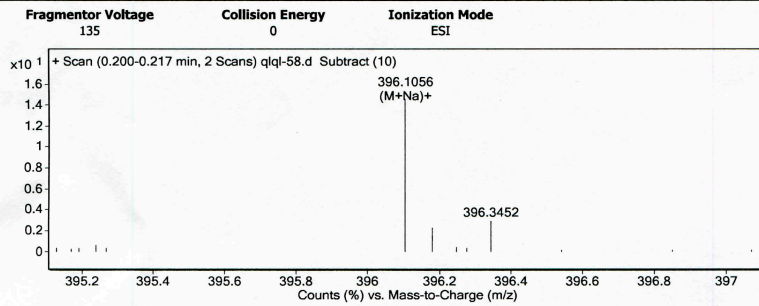

**Peak List**

| m/z      | z | Abund    | Formula      | Ion     |
|----------|---|----------|--------------|---------|
| 274.2744 | 1 | 27249.32 |              |         |
| 302.3056 | 1 | 11985.32 |              |         |
| 318.2997 | 1 | 14544.99 |              |         |
| 330.3365 | 1 | 7923.88  |              |         |
| 396.1056 | 1 | 10285.74 | C19 H19 N O7 | (M+Na)+ |
| 453.1669 | 1 | 8345.76  |              |         |

**Formula Calculator Element Limits**

| Element | Min | Max |
|---------|-----|-----|
| C       | 3   | 60  |
| H       | 0   | 120 |
| N       | 0   | 10  |
| O       | 0   | 30  |

**Formula Calculator Results**

| Formula      | CalculatedMass | CalculatedMz | Mz       | Diff. (mDa) | Diff. (ppm) | DBE     |
|--------------|----------------|--------------|----------|-------------|-------------|---------|
| C19 H19 N O7 | 373.1162       | 396.1054     | 396.1056 | -0.6        | -1.6        | 11.0000 |

--- End Of Report ---

**Figure S12. HRESIMS spectrum of 2.**

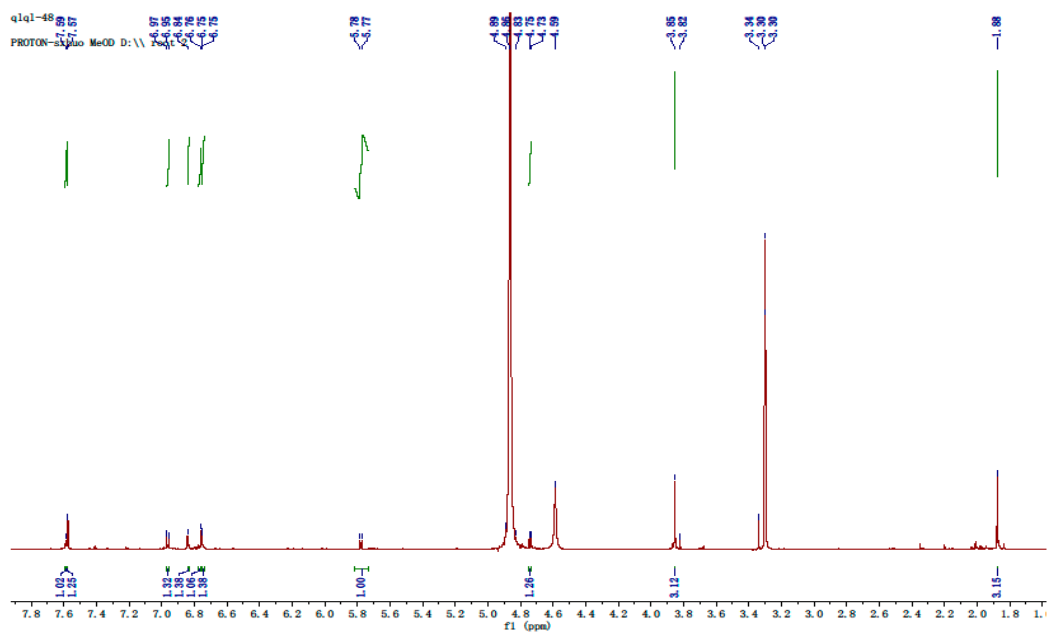

Figure S13.  $^1\text{H}$ -NMR spectrum of **3** in  $\text{CD}_3\text{OD}$ .

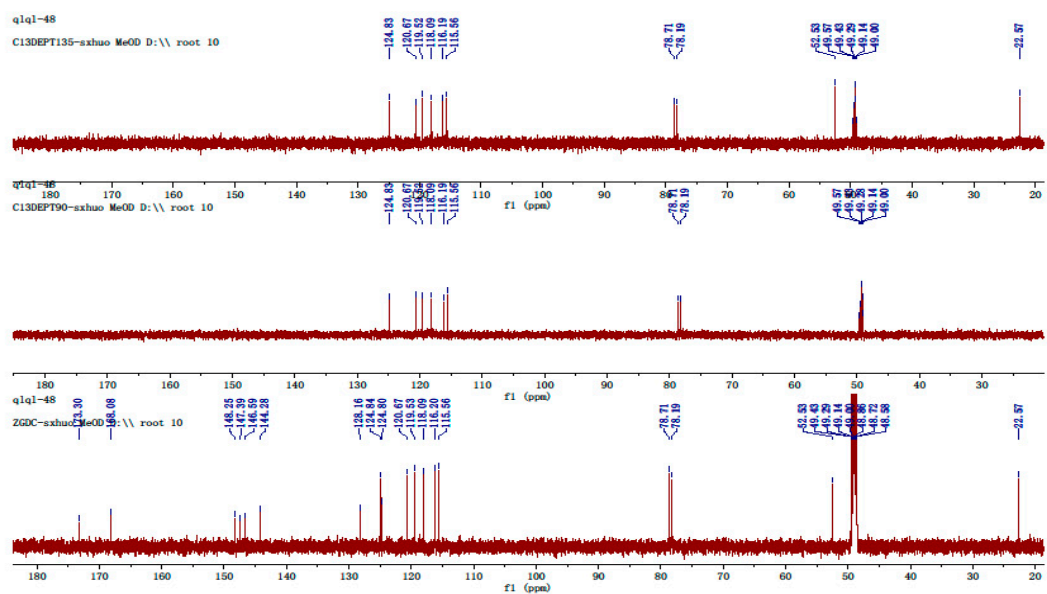

Figure S14.  $^{13}\text{C}$ -NMR and DEPT spectra of **3** in  $\text{CD}_3\text{OD}$ .

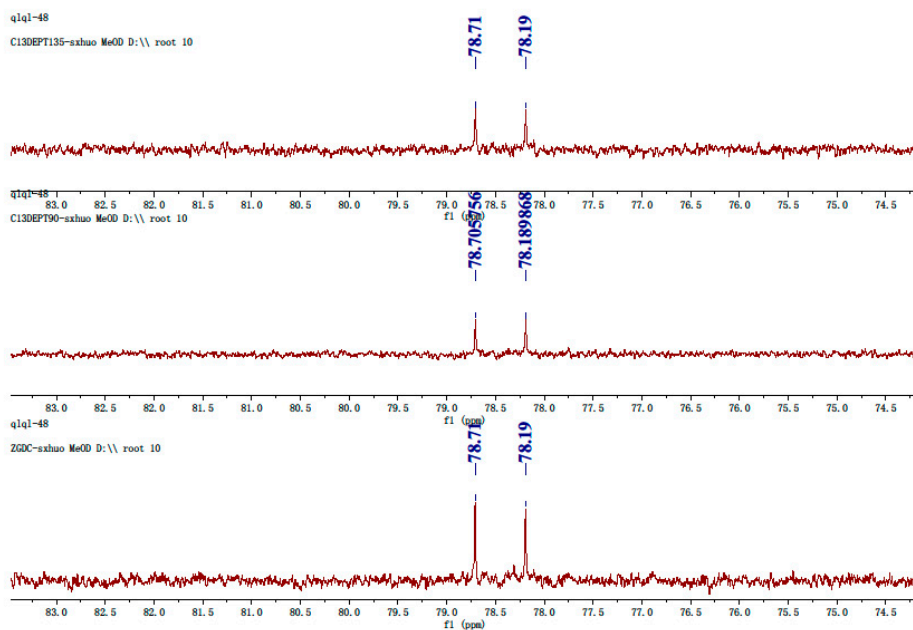

Enlarged  $^{13}\text{C}$ -NMR and DEPT spectra of **3** (C-2, C-3) in  $\text{CD}_3\text{OD}$ .

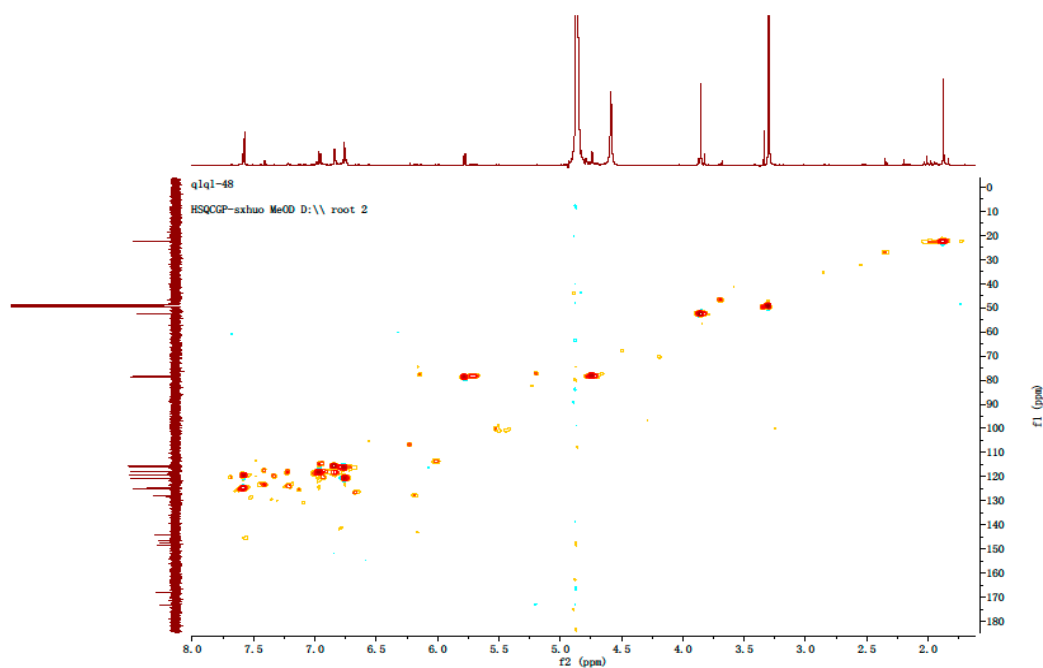

Figure S15. HSQC spectrum of **3** in  $\text{CD}_3\text{OD}$ .

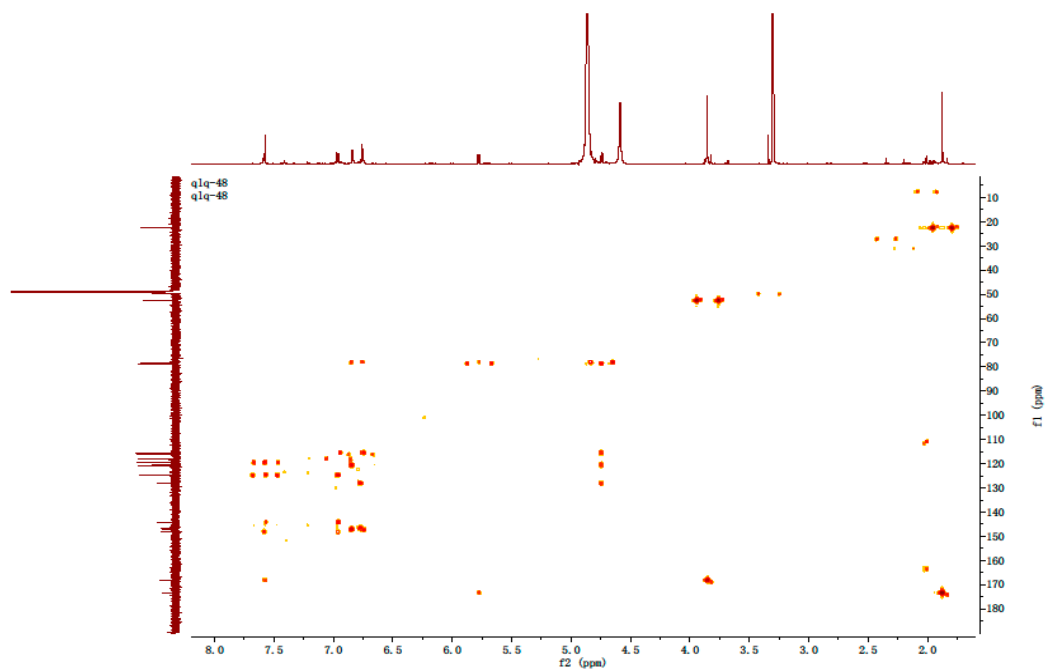

Figure S16. HMBC spectrum of **3** in CD<sub>3</sub>OD.

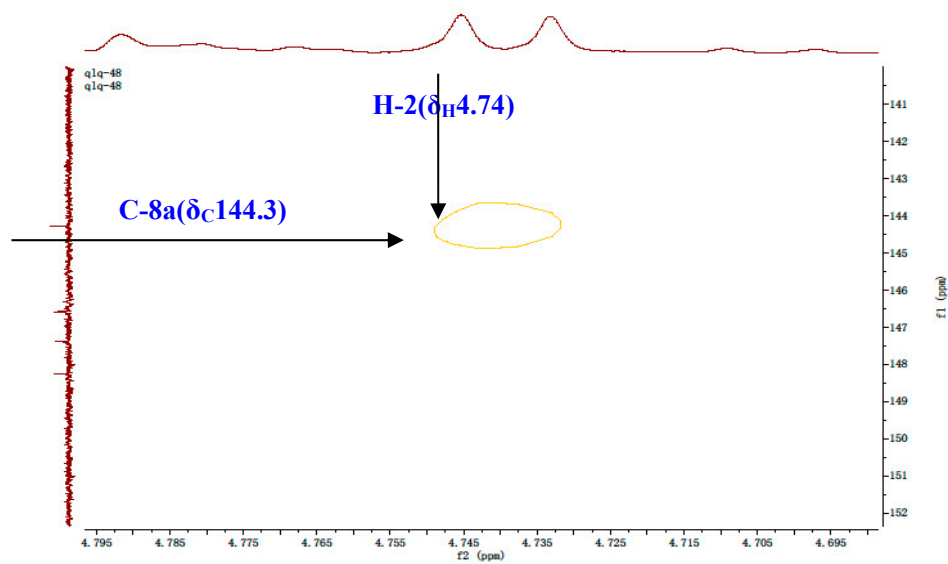

Enlarged HMBC spectrum of **3** (key correlations of H-2/C-8a) in CD<sub>3</sub>OD.

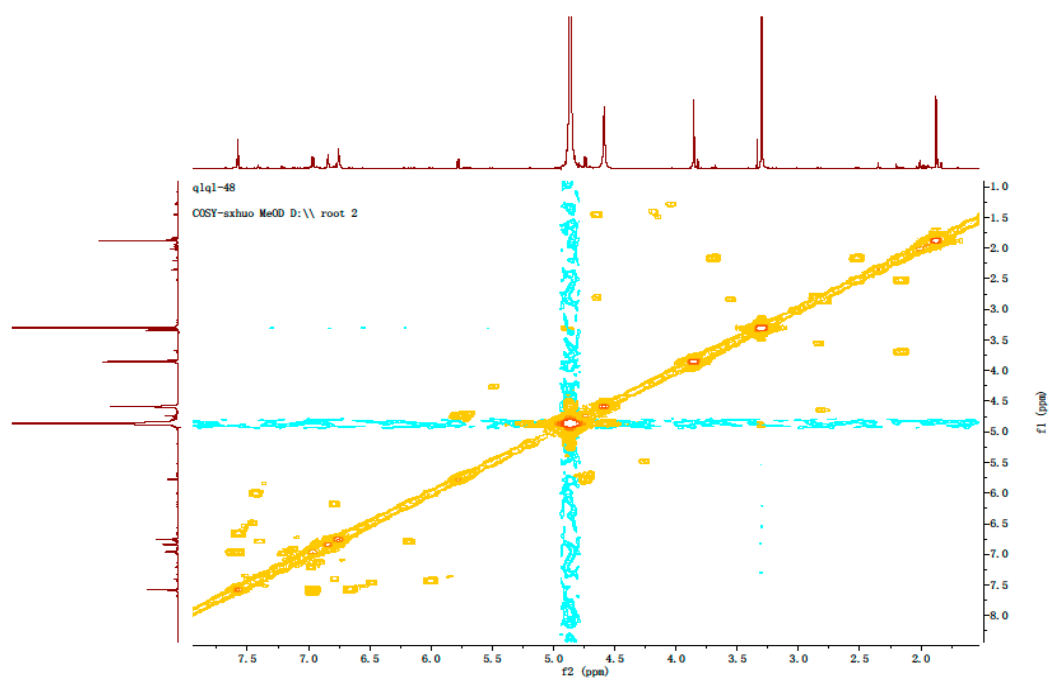

**Figure S17.**  $^1\text{H}$ - $^1\text{H}$  COSY spectrum of **3** in  $\text{CD}_3\text{OD}$ .

## Qualitative Analysis Report

|                               |              |                      |                      |
|-------------------------------|--------------|----------------------|----------------------|
| <b>Data Filename</b>          | qlql-48.d    | <b>Sample Name</b>   | qlql-48              |
| <b>Sample Type</b>            | Sample       | <b>Position</b>      | P1-A2                |
| <b>Instrument Name</b>        | Instrument 1 | <b>User Name</b>     |                      |
| <b>Acq Method</b>             | SIBU.m       | <b>Acquired Time</b> | 4/13/2015 2:08:21 PM |
| <b>IRM Calibration Status</b> | Success      | <b>DA Method</b>     | Default.m            |
| <b>Comment</b>                |              |                      |                      |

|                       |                             |              |
|-----------------------|-----------------------------|--------------|
| <b>Sample Group</b>   |                             | <b>Info.</b> |
| <b>Acquisition SW</b> | 6200 series TOF/6500 series |              |
| <b>Version</b>        | Q-TOF B.05.01 (B5125.2)     |              |

### User Spectra

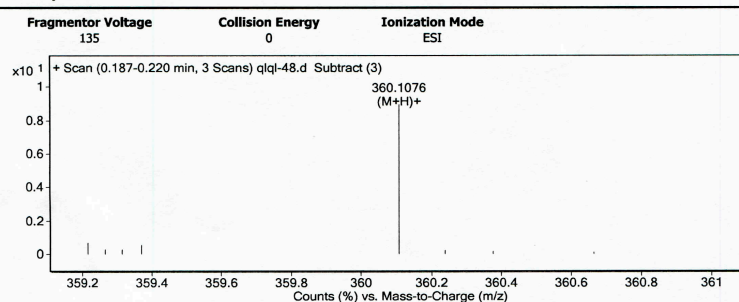

### Peak List

| m/z      | z | Abund    |
|----------|---|----------|
| 274.2743 | 1 | 26317.84 |
| 302.3053 | 1 | 11388.74 |
| 318.3003 | 1 | 14657.39 |
| 330.3369 | 1 | 9079.19  |
| 380.2071 | 1 | 24642.24 |
| 396.1808 | 1 | 13134.54 |

### Formula Calculator Element Limits

| Element | Min | Max |
|---------|-----|-----|
| C       | 3   | 60  |
| H       | 0   | 120 |
| N       | 0   | 10  |
| O       | 0   | 30  |

### Formula Calculator Results

| Formula      | CalculatedMass | CalculatedMz | Mz       | Diff. (mDa) | Diff. (ppm) | DBE     |
|--------------|----------------|--------------|----------|-------------|-------------|---------|
| C18 H17 N O7 | 359.1005       | 360.1078     | 360.1076 | -0.1        | -0.3        | 11.0000 |

--- End Of Report ---

Figure S18. HRESIMS spectrum of 3.



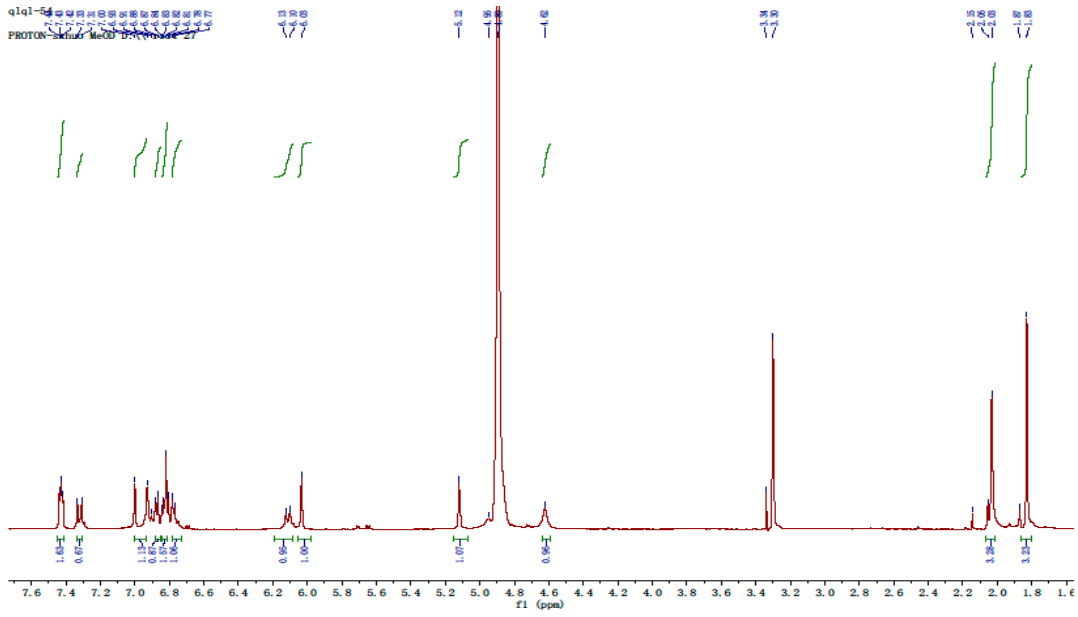

Figure S19.  $^1\text{H}$ -NMR spectrum of **4** in  $\text{CD}_3\text{OD}$ .

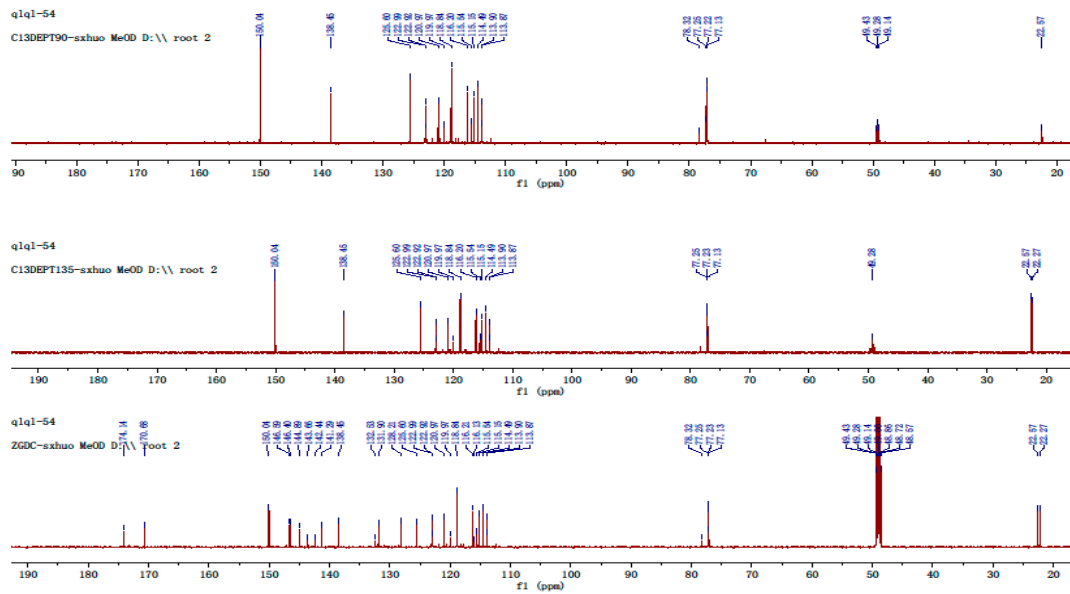

Figure S20.  $^{13}\text{C}$ -NMR and DEPT spectra of **4** in  $\text{CD}_3\text{OD}$ .

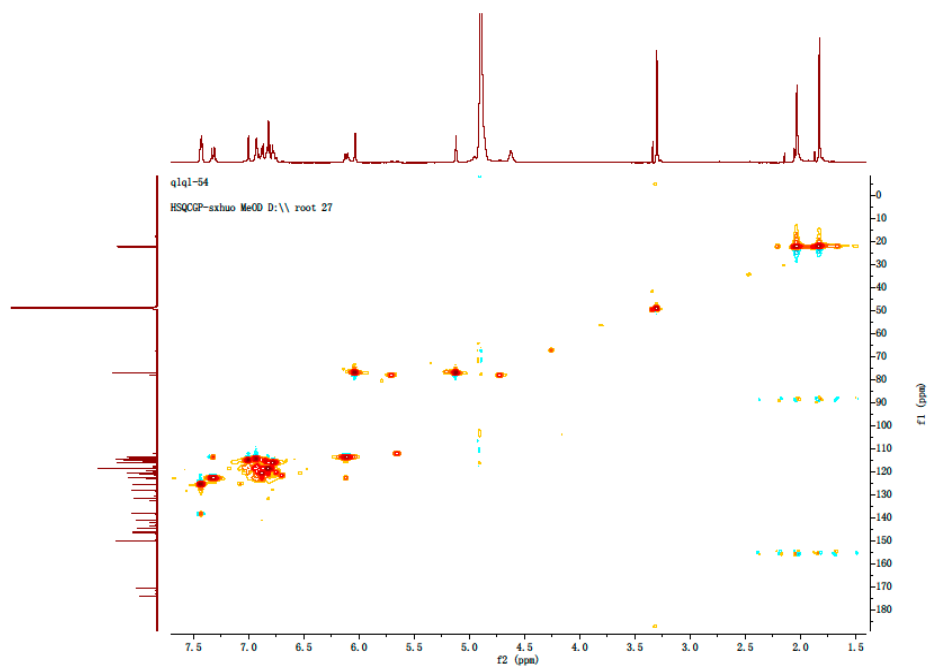

Figure S21. HSQC spectrum of 4 in CD<sub>3</sub>OD.

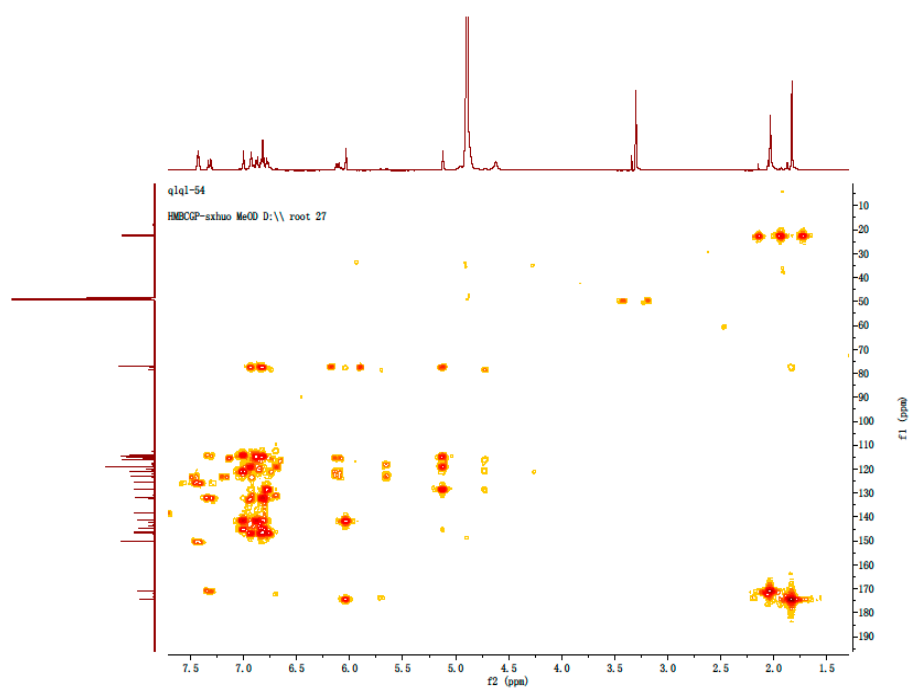

Figure S22. HMBC spectrum of 4 in CD<sub>3</sub>OD.

**Table S1.** The  $^1\text{H}$ - (600 MHz) and  $^{13}\text{C}$ -NMR (150 MHz) spectroscopic data of **4** in  $\text{CD}_3\text{OD}$ .

| Position | <b>4</b>                      |                            |
|----------|-------------------------------|----------------------------|
|          | $\delta_{\text{H}}$ (J in Hz) | $\delta_{\text{C}}$ , mult |
| 2        | 6.33, d, 7.2                  | 77.1, CH                   |
| 3        | 6.03, d, 7.2                  | 77.2, CH                   |
| 5        | 6.92, d, 9.0                  | 113.9, CH                  |
| 6        | 6.85, dd, 9.0, 1.8            | 125.6, CH                  |
| 7        |                               | 131.9, qC                  |
| 8        | 7.00, d, 1.8                  | 118.8, CH                  |
| 1'       |                               | 128.2, qC                  |
| 2'       | 6.82, d, 2.0                  | 115.1, CH                  |
| 3'       |                               | 146.4, qC                  |
| 4'       |                               | 146.6, qC                  |
| 5'       | 6.81, d, 8.2                  | 116.2, CH                  |
| 6'       | 6.76, dd, 8.2, 2.0            | 120.9, CH                  |
| 1''      | 5.12, d, 7.6                  | 113.9, $\text{CH}_2$       |
| 2''      | 7.32, d, 7.6                  | 122.9, $\text{CH}_2$       |
| 3''      |                               | 170.7, qC                  |
| 4''      | 2.04, s                       | 22.3, $\text{CH}_3$        |
| 3a       |                               | 174.1, qC                  |
| 3b       | 1.84, s                       | 22.6, $\text{CH}_3$        |
| 4a       |                               | 141.3, qC                  |
| 8a       |                               | 144.9, qC                  |

**Table S2.** COX-1 and COX-2 inhibitory activities of the compounds.

| Compd.   | $\text{IC}_{50}$ ( $\mu\text{M}$ ) |       |
|----------|------------------------------------|-------|
|          | COX-1                              | COX-2 |
| <b>1</b> | NA <sup>a</sup>                    | NA    |
| <b>2</b> | NA                                 | NA    |
| <b>3</b> | NA                                 | NA    |
| <b>4</b> | 78.85                              | 6.43  |
| <b>5</b> | NA                                 | NA    |

<sup>a</sup>NA: no activity.**Table S3.** Cytotoxicity activities of the compounds

| Compd.   | $\text{IC}_{50}$ ( $\mu\text{M}$ ) |       |      |       |      |        |       |      |
|----------|------------------------------------|-------|------|-------|------|--------|-------|------|
|          | K562                               | MCF-7 | A549 | H1975 | Hela | DU145H | Huh-7 | A431 |
| <b>1</b> | NA <sup>a</sup>                    | NA    | NA   | >30   | NA   | NA     | >30   | >30  |
| <b>2</b> | NA                                 | NA    | NA   | NA    | NA   | NA     | >30   | >30  |
| <b>3</b> | NA                                 | NA    | NA   | NA    | NA   | NA     | >30   | NA   |
| <b>4</b> | NA                                 | NA    | NA   | NA    | NA   | NA     | NA    | NA   |
| <b>5</b> | NA                                 | NA    | NA   | NA    | NA   | NA     | NA    | NA   |

<sup>a</sup>NA: no activity.

**Table S4.** MDCK cell-based anti-influenza activities of the compounds.

| <b>Compd.</b> | <b>IC<sub>50</sub> (μM)</b> |             |
|---------------|-----------------------------|-------------|
|               | <b>H1N1</b>                 | <b>H3N2</b> |
| <b>1</b>      | NA <sup>a</sup>             | NA          |
| <b>2</b>      | NA                          | NA          |
| <b>3</b>      | NA                          | NA          |
| <b>4</b>      | NA                          | NA          |
| <b>5</b>      | NA                          | NA          |

<sup>a</sup>NA: no activity.**Table S5.** EV71 inhibitory activities of the compounds at 30 μM.

| <b>Compd.</b> | <b>Inhibition %</b> |
|---------------|---------------------|
| <b>1</b>      | 1.7                 |
| <b>2</b>      | 1.7                 |
| <b>3</b>      | 1.4                 |
| <b>4</b>      | 1.2                 |
| <b>5</b>      | 2.2                 |
